# Supplementary material for: Guidelines for a participatory Smart City model to address Amazon’s urban environmental problems
Source: PeerJ journal article supplement (doi:10.7717/peerj-cs.1694), 2023-12-12
Supplement: Appendix1.pdf [file Appendix1.pdf]

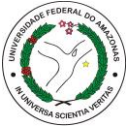

## Appendix 1 – Questionnaire to consult Manaus’s City Hall Managers

- 1) Vision: What is the long-term vision and strategy to transform Manaus into a Smart City?
- 2) Vision: Where can citizens find the Strategic Plan or Project to achieve this vision?
- 3) Leadership: Who are the leaders responsible for managing this Plan/Project?
- 4) Budget: What is the budget allocated for this undertaking?
- 5) Budget: In which official gazette was the budget published
- 6) Financial Incentives: What financial incentives is the City offering to encourage entrepreneurs, universities, startups, and organizations to support the Smart City project?
- 7) Support Programs: What programs has the city developed to encourage private sector participation?
- 8) Talent Preparation: What plan was created to educate citizens and provide skills needed for a Smart City?
- 9) Citizen Participation: What initiatives engaged citizens in the Strategic Plan/Project?
- 10) Citizen Participation: How will the city guarantee Smart City benefits reach most citizens?
- 11) Innovation Ecosystem: Who are the local innovation partners involved and what are their responsibilities?
- 12) Innovation Ecosystem: What are the partners' responsibilities?
- 13) Smart Policies: What public policies were effectively developed to make Manaus Smart?
- 14) Smart Policies: What actions updated regulations to support this undertaking?
- 15) Historical Record: Which good practices have been recorded?
- 16) Which Smart City model is being implemented?
- 17) Where can citizens access this information on the Manaus City Hall website?
