# Supplementary material for: Guidelines for a participatory Smart City model to address Amazon’s urban environmental problems
Source: PeerJ journal article supplement (doi:10.7717/peerj-cs.1694), 2023-12-12
Supplement: Appendix5.pdf [file Appendix5.pdf]

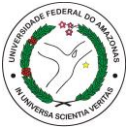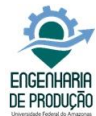

### Appendix 5 – Table A2 Profile of Twenty-Five Benchmark Smart Cities

| Rank and Initiatives                                                                                                                                                                                                                                                                                                 | Smart City Definition (D), Type (T), and Vision(V)                                                                                                                                                                                                                                                                                                                                                                                                                                                                                                                                                                                                       | Terms and Digital Platforms                                                                                                                                                                                                                                                                                                                                                                                                                                                                                                         | Fab, Living or Urban Labs                                                                                                                                                                                                                                     |
|----------------------------------------------------------------------------------------------------------------------------------------------------------------------------------------------------------------------------------------------------------------------------------------------------------------------|----------------------------------------------------------------------------------------------------------------------------------------------------------------------------------------------------------------------------------------------------------------------------------------------------------------------------------------------------------------------------------------------------------------------------------------------------------------------------------------------------------------------------------------------------------------------------------------------------------------------------------------------------------|-------------------------------------------------------------------------------------------------------------------------------------------------------------------------------------------------------------------------------------------------------------------------------------------------------------------------------------------------------------------------------------------------------------------------------------------------------------------------------------------------------------------------------------|---------------------------------------------------------------------------------------------------------------------------------------------------------------------------------------------------------------------------------------------------------------|
| <p><b>First place</b></p> <p><b>Amsterdam (NL)</b></p> <p>In 1994: Virtual Digital City (De Digital Stad-DDS)</p> <p>Since 2009: Amsterdam Smart City Program</p> <p>In 2015: IBM Smart City Challenge (SCC) Winner</p> <p>Since 2019: Amsterdam Climate Neutral2050 RoadMap Local Government and Private Sector</p> | <p>D: Not found.</p> <p>Phase 1: 2009 – 2011 focused on <b>energy efficiency</b>. Phase 2: 2012 – 2014 focused on <b>energy efficiency</b> and <b>internet-related applications</b> (Capra 2014, p. 40).</p> <p>V1: In 2020, Amsterdam will be one of the <b>most sustainable cities</b> in the world (Osieck, 2011 p. 155)</p> <p><b>T: Open Innovation Platform.</b></p> <p>V2: An <b>open innovation platform</b> that brings together <b>innovation</b> professionals from <b>government, companies, knowledge institutions, and civil society organizations</b> to shape the <b>city</b> and region of the future. (Amsterdam Smart City, 2022)</p> | <p>Fields: Economy, Environment, Living, Governance, People</p> <p>Goal: Efficiency, QoL, Sustainability</p> <p>TA: Technology</p> <p>Other: Apps, Open Innovation, Stakeholders</p> <p>Digital Platforms to Engage Citizens: Amsterdam Smart City Platform, Amsterdam Participatie, Amsterdam Smart Citizens Lab, CityData, Smart Health Amsterdam site, Budgetmonitoring, Amsterdam Smart City Living Lab, GVB app, LEAP, MyCleanCity app, Amsterdam Data Platform <a href="http://data.amsterdam.nl/">data.amsterdam.nl/</a></p> | <p>Amsterdam</p> <p>Energy City Lab</p> <p>Circle Lab</p> <p>Amsterdam</p> <p>Smart Citizens Lab</p> <p>FabLab</p> <p>Amsterdam</p> <p>Living Lab</p> <p>Circular</p> <p>Buiksloterham,</p> <p>Living Lab</p> <p>Sloterdijk III</p> <p>Waag Research Labs</p> |

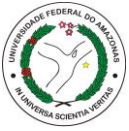

AMAZON FEDERAL UNIVERSITY – FACULTY OF TECHNOLOGY

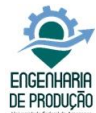

| Rank and Initiatives                                                                                                                                                                                                                 | Smart City Definition (D), Type (T), and Vision(V)                                                                                                                                                                                                                                                                                                                                                                                                                                                                                                                   | Terms and Digital Platforms                                                                                                                                                                                                                                                                                                                                                                                                        | Fab, Living or Urban Labs                                                                                                                     |
|--------------------------------------------------------------------------------------------------------------------------------------------------------------------------------------------------------------------------------------|----------------------------------------------------------------------------------------------------------------------------------------------------------------------------------------------------------------------------------------------------------------------------------------------------------------------------------------------------------------------------------------------------------------------------------------------------------------------------------------------------------------------------------------------------------------------|------------------------------------------------------------------------------------------------------------------------------------------------------------------------------------------------------------------------------------------------------------------------------------------------------------------------------------------------------------------------------------------------------------------------------------|-----------------------------------------------------------------------------------------------------------------------------------------------|
| <p><b>Second place Singapore</b><br/>1986: National IT Plan<br/>2006: Wireless@SG<br/>2011: eGov2015 Master Plan<br/>2012: Jurong Lake District won IBM SCC<br/>Since 2014: Smart Nation Initiative<br/>National, Local, Private</p> | <p>D: Not found, but it is pioneering in the concept of Smart Nation (Quélin and Smadja, 2021 p. 18)</p> <p><b>T: Digital Society, Economy, and Government.</b></p> <p>V: Smart Nation is a transformed Singapore where <b>people</b> will be more empowered to <b>live</b> meaningful and fulfilled <b>lives, seamlessly</b> enabled by <b>technology</b>, that offers exciting opportunities for all. It is where <b>businesses</b> can be more productive and take advantage of new opportunities in the <b>digital economy</b>. (Singapore Government, 2018)</p> | <p>Fields: Economy, People, Living, Governance<br/>Goal: Efficiency, QoL<br/>TA: Technology<br/>Others: Business, Digital Economy, Society, Government, Collaboration<br/>Digital Platforms to Engage Citizens:<br/>Smart Nation Platform, My Info, SingPass, Health Hub, Hello Lump Posts, SGSecure App, eCitizen, OneService App, CityLab<br/>Singapore Data Gov<br/><a href="https://data.gov.sg/">https://data.gov.sg/</a></p> | <p>Sustainable Living Lab (SL2)<br/>MPA Living Lab<br/>PSA Living Lab<br/>Jurong Port Living Lab<br/>NTU Smart Nation<br/>Translation Lab</p> |
| <p><b>Third Place London (UK)</b><br/>Since 2013: Smarter London Plan<br/>Won the ODI Annual Open Data Award 2015<br/>Since 2018: Smarter London Together Roadmap</p>                                                                | <p>D: The general term used to discuss how cities across the globe are <b>sharing information</b> and making use of <b>technology</b> to work more <b>efficiently</b> (Greater London Authority, 2013 p. 58).</p> <p>T1: <b>Smart</b></p> <p>V1: A city that uses the creative power of <b>data</b> and <b>new technologies</b> to serve London and improve <b>Londoners’ lives</b> (Greater London Authority, 2013 p. 13; 2016 p. 10)</p> <p>T2: <b>Collaborative, Connected, and Responsive city.</b></p>                                                          | <p>Fields: Economy, Env., Gov., Living, People<br/>Goal: Efficiency, Sustainability, QoL<br/>TA: Connection, Technology, Information<br/>Others: Collaborative, Responsive, Data, City, Digital, Resilient<br/>Digital platforms: Talk London, Citymapper, Report It, London Living Streets, City Lab, Live Park, Citizen Lab, Safe &amp; The City App,</p>                                                                        | <p>CitizenLab<br/>Smart Mobility Living Lab (SMLL)<br/>Energy Systems<br/>Catapult Living Lab<br/>University of</p>                           |



AMAZON FEDERAL UNIVERSITY – FACULTY OF TECHNOLOGY



|                                                                                                                                                                                                                                                                            |                                                                                                                                                                                                                                                                                                                                                                                                                                                                                                                                                                                                                                                                                                                                                                                                                                                                                                                                 |                                                                                                                                                                                                                                                                                                                                                                                                                                                                                                                   |                                                                        |
|----------------------------------------------------------------------------------------------------------------------------------------------------------------------------------------------------------------------------------------------------------------------------|---------------------------------------------------------------------------------------------------------------------------------------------------------------------------------------------------------------------------------------------------------------------------------------------------------------------------------------------------------------------------------------------------------------------------------------------------------------------------------------------------------------------------------------------------------------------------------------------------------------------------------------------------------------------------------------------------------------------------------------------------------------------------------------------------------------------------------------------------------------------------------------------------------------------------------|-------------------------------------------------------------------------------------------------------------------------------------------------------------------------------------------------------------------------------------------------------------------------------------------------------------------------------------------------------------------------------------------------------------------------------------------------------------------------------------------------------------------|------------------------------------------------------------------------|
| <p>Local, Private,<br/>National</p>                                                                                                                                                                                                                                        | <p>V2: Integrates <b>digital technologies</b> and uses <b>city-wide data</b> to the needs of respond to our <b>citizens</b> (Greater London Authority, 2018)</p>                                                                                                                                                                                                                                                                                                                                                                                                                                                                                                                                                                                                                                                                                                                                                                | <p>London Datastore<br/>data.london.gov.uk/<br/>Transport For London (TfL)<br/>Open Data<br/><a href="http://bit.ly/3EMB7SJ">http://bit.ly/3EMB7SJ</a></p>                                                                                                                                                                                                                                                                                                                                                        | <p>Greenwich<br/>Living Lab</p>                                        |
| <p><b>Fourth place</b><br/><b>New York</b><br/><b>(USA)</b></p> <p>Since 2007:<br/>PlanNYC</p> <p>Since 2011:<br/>Digital City<br/>Roadmap<br/>NYP</p> <p>Since 2015:<br/>OneNYC</p> <p>Since 2022:<br/>OneNYC 2050</p> <p>OTI Strategic<br/>Plan<br/>Local initiative</p> | <p>D1: Any <b>local government</b> that leverages <b>technology</b> solutions to promote public health, safety and welfare, and improves <b>quality of life</b> for the <b>residents</b> of the <b>municipality</b>, especially traditionally underserved and under-resourced communities (NY State, 2020).</p> <p>D2: A <b>local government</b> that uses <b>technology</b> and <b>planning practices</b> to generate better outcomes for its <b>residents</b> through the use of <b>data</b>. (NYC (2021)</p> <p>T1: Digital City; V1: be recognized as the world’s top-ranked <b>Digital City</b>, based on indices of <b>Internet</b> access, <b>Open Government</b>, <b>citizen engagement</b>, and <b>digital industry</b> growth (NYC, 2011)</p> <p>T2: Connected City; V2: Ensure <b>all New Yorkers</b> have access to effectively engage with the <b>digital economy</b> and <b>society</b> (NYC OTI, 2022 p. 10)</p> | <p>Fields: Economy, Environment, Governance, Living, People</p> <p>Goal: Efficiency, Sustainability, QoL</p> <p>TA: Connection, Technology</p> <p>Others: Data, Digital City, Digital Industry, Digital Economy, Open Government.</p> <p>Digital platforms:<br/>NYC Engage, NYC Open Data, NYC 311, Participatory Budgeting, Urban Innovation Lab, Cowlines App, Nextdoor App, Mytown App, NYC Open Data</p> <p><a href="https://opendata.cityofnewyork.us/data/">https://opendata.cityofnewyork.us/data/</a></p> | <p>NYCx Co-Lab</p> <p>Urban Future Lab</p> <p>Urban Innovation Lab</p> |



AMAZON FEDERAL UNIVERSITY – FACULTY OF TECHNOLOGY



| Rank and Initiatives                                                                                                                                                                                                                                                                                                                                | Smart City Definition (D), Type (T), and Vision(V)                                                                                                                                                                                                                                                                                                                                                                                                                                                                                                                                                                                                                                                                                                                                                                                                                                                                                                                                                                                                                                                                                                         | Terms and Digital Platforms                                                                                                                                                                                                                                                                                                                                                                                                                                                                                                                                                        | Fab, Living or Urban Labs                                                                                                                             |
|-----------------------------------------------------------------------------------------------------------------------------------------------------------------------------------------------------------------------------------------------------------------------------------------------------------------------------------------------------|------------------------------------------------------------------------------------------------------------------------------------------------------------------------------------------------------------------------------------------------------------------------------------------------------------------------------------------------------------------------------------------------------------------------------------------------------------------------------------------------------------------------------------------------------------------------------------------------------------------------------------------------------------------------------------------------------------------------------------------------------------------------------------------------------------------------------------------------------------------------------------------------------------------------------------------------------------------------------------------------------------------------------------------------------------------------------------------------------------------------------------------------------------|------------------------------------------------------------------------------------------------------------------------------------------------------------------------------------------------------------------------------------------------------------------------------------------------------------------------------------------------------------------------------------------------------------------------------------------------------------------------------------------------------------------------------------------------------------------------------------|-------------------------------------------------------------------------------------------------------------------------------------------------------|
| <p><b>Fifth place Helsinki (Fi)</b></p> <p>In 2010: Helsinki Region Infoshare Program</p> <p>In 2011: Won IBM SCC: A project to open data to citizens.</p> <p>Since 2012 (?): Helsinki Smart Region</p> <p>Since 2014: Smart &amp; Clean Helsinki Metropolitan Area</p> <p>Since 2017: Helsinki City Strategy</p> <p>Local, Private, and Region</p> | <p>Not found Smart City definition.</p> <p>T1: <b>Living Lab</b> (a platform for collaborative projects that bring users with their ideas, experiences, and enable the <b>business community</b> to develop the products and services that are of the greatest interest to the public) (Hielkema and Hongisto, 2012).</p> <p>V1: Not clear</p> <p>T2: <b>Platform</b> for <b>Smart</b> and <b>Clean</b> Solutions.</p> <p>V2: Turn the Helsinki Metropolitan area into an internationally important reference area for <b>ecological</b> and <b>smart</b> solutions by 2021 and showcase the <b>best products and services</b> of Finnish and international companies. (SITRA, 2015)</p> <p>T3: <b>Innovation ecosystem</b> for <b>Green</b> and <b>Digital</b> Transition.</p> <p>V3: Until 2021, to be the world’s most <b>functional</b> city. In addition, Helsinki aims to be the city in the world that makes the best use of <b>Digitalization</b> (Helsinki, 2017 p. 16).</p> <p>V4: Not clear but focuses on three themes until 2030: <b>Citizens’s City, Climate Neutrality, and Industrial Modernization.</b> (Helsinki Smart Region, 2022)</p> | <p>Fields: Environment, Governance, Living, People, Economy</p> <p>Goal: Efficiency, Sustainability, QoL</p> <p>TA: Technology</p> <p>Others: Data, Living Lab, Platform, Innovation, City, Industrial Modernization, Digital, Ecosystem</p> <p>Digital Platforms to Engage Citizens:</p> <p>Helsinki Smart Region website</p> <p>Helsinki Regional Infoshare</p> <p>Forum Virium Helsinki</p> <p>Digital Forms</p> <p>Waste Management System</p> <p>FixMyStreet</p> <p>mySMARTLife</p> <p>Open Data Service</p> <p><a href="https://hri.fi/en_gb/">https://hri.fi/en_gb/</a></p> | <p>Forum Virium Helsinki</p> <p>Kalasadama Urban Lab</p> <p>Jatkasaari Smart Mobility Lab</p> <p>Helsinki Living Lab</p> <p>Mobility Lab Helsinki</p> |



AMAZON FEDERAL UNIVERSITY – FACULTY OF TECHNOLOGY



| Rank and Initiatives                                                                                                                                                                                                                                                                                                                              | Smart City Definition (D), Type (T), and Vision(V)                                                                                                                                                                                                                                                                                                                                                                                                                                                                                                                                                                                                                                                                                                                                                                                                                                                                                                                                                                                                                                                                                                                                                                                           | Terms and Digital Platforms                                                                                                                                                                                                                                                                                                                                                                                     | Fab, Living or Urban Labs                                                                                                                                           |
|---------------------------------------------------------------------------------------------------------------------------------------------------------------------------------------------------------------------------------------------------------------------------------------------------------------------------------------------------|----------------------------------------------------------------------------------------------------------------------------------------------------------------------------------------------------------------------------------------------------------------------------------------------------------------------------------------------------------------------------------------------------------------------------------------------------------------------------------------------------------------------------------------------------------------------------------------------------------------------------------------------------------------------------------------------------------------------------------------------------------------------------------------------------------------------------------------------------------------------------------------------------------------------------------------------------------------------------------------------------------------------------------------------------------------------------------------------------------------------------------------------------------------------------------------------------------------------------------------------|-----------------------------------------------------------------------------------------------------------------------------------------------------------------------------------------------------------------------------------------------------------------------------------------------------------------------------------------------------------------------------------------------------------------|---------------------------------------------------------------------------------------------------------------------------------------------------------------------|
| <p><b>6<sup>th</sup> Seoul (SK)</b></p> <p>Since 2011:<br/>Smart Seoul 2015</p> <p>Since 2016:<br/>Global Digital Seoul 2020 Master Plan</p> <p>Since 2018:<br/>Smart City Strategic Plan</p> <p>In 2019: Magok Smart City Living Lab</p> <p>Since 2021:<br/>Smart Seoul Smart City &amp; Digitalization Master Plan Local, Private, National</p> | <p>Not found local definition, but national</p> <p>D1: A <b>platform</b> to improve the <b>quality of life</b> of <b>citizens</b>, enhance the <b>sustainability</b> of cities, and foster <b>new industries</b> by utilizing <b>innovative technologies</b> of the <b>fourth industrial revolution</b> era. (South Korea Ministry of Land, Infrastructure and Transport, 2019 p. 5)</p> <p>D2: A <b>sustainable city</b> where various city services are provided based on city <b>infrastructure</b> constructed by converging and integrating construction <b>technologies, information and communications technologies</b>, etc. to enhance its <b>competitiveness</b> and <b>livability</b> (South Korea MOLIT, 2021).</p> <p>V1: By 2015, Seoul will become a city that best applies Smart <b>Technologies</b>, thought which we will make real your slogan, ‘Seoul, a city of happy <b>citizens</b> and a city beloved by the world’ (Seoul Metropolitan City, 2011 p. 2)</p> <p>T1: <b>Smart Government</b></p> <p>V2: By 2020, a <b>digital</b> Seoul made by <b>citizens</b> for better <b>economy</b> lives to become a <b>global digital</b> leader (Seoul Metropolitan Government, 2016 p. 5)</p> <p>T2: Connected, Digital</p> | <p>Fields: Economy, Environment, People, Living</p> <p>Goal: Quality of Life, Sustainability</p> <p>TA: Technology, ICT,</p> <p>Others: Digital, Innovation, Platform, Global</p> <p>Digital Platforms to Engage Citizens:</p> <p>Seoul Smart City Platform</p> <p>Safety e-Report</p> <p>Mvoting App and Site</p> <p>Open Data Seoul<br/><a href="https://data.seoul.go.kr/">https://data.seoul.go.kr/</a></p> | <p>Magok Smart City Living Lab (MLL)</p> <p>Living Lab in Seoul Innovation Park</p> <p>Seongdaegol Living Lab</p> <p>Yonsei University’s Information System Lab</p> |



AMAZON FEDERAL UNIVERSITY – FACULTY OF TECHNOLOGY



|                                                                                                                                                                                                                                             |                                                                                                                                                                                                                                                                                                                                                                                                                                                                                                                                                                                                                                                                                                                                                                                                                                                                                                                                                                                                                                                                                                        |                                                                                                                                                                                                                                                                                                                                                                                                                                                                        |                                                                                                                                                                                                                                    |
|---------------------------------------------------------------------------------------------------------------------------------------------------------------------------------------------------------------------------------------------|--------------------------------------------------------------------------------------------------------------------------------------------------------------------------------------------------------------------------------------------------------------------------------------------------------------------------------------------------------------------------------------------------------------------------------------------------------------------------------------------------------------------------------------------------------------------------------------------------------------------------------------------------------------------------------------------------------------------------------------------------------------------------------------------------------------------------------------------------------------------------------------------------------------------------------------------------------------------------------------------------------------------------------------------------------------------------------------------------------|------------------------------------------------------------------------------------------------------------------------------------------------------------------------------------------------------------------------------------------------------------------------------------------------------------------------------------------------------------------------------------------------------------------------------------------------------------------------|------------------------------------------------------------------------------------------------------------------------------------------------------------------------------------------------------------------------------------|
|                                                                                                                                                                                                                                             | V3: Seoul, Leading the Future of <b>Digital Transformation as a Global Smart City</b> (Seoul Metropolitan Government, 2021)                                                                                                                                                                                                                                                                                                                                                                                                                                                                                                                                                                                                                                                                                                                                                                                                                                                                                                                                                                            |                                                                                                                                                                                                                                                                                                                                                                                                                                                                        |                                                                                                                                                                                                                                    |
| <p><b>7<sup>th</sup> Copenhagen (DK)</b></p> <p>In 2012: CPH 2025 climate plan</p> <p>In 2013: Won IBM SCC Denmark Digital Growth</p> <p>Since 2013: Copenhagen Connecting Greater Copenhagen Smart City (?)</p> <p>Local &amp; Private</p> | <p>D1: not found, but the smart city initiatives focused on <b>environmental</b> issues that are related to the commitment to <b>carbon neutrality</b> (Quélin and Smadja, 2021 p. 14)</p> <p>T1: <b>Carbon Neutral</b></p> <p>V1: Make the city <b>carbon neutral</b> by 2025, and in doing creating a <b>greener</b>, more <b>sustainable</b>, and more <b>livable</b> capital city, as well as supporting growth (C40 Knowledge, 2017; Quélin and Smadja, 2021).</p> <p>D2: not found; T2: Connected; V2: Be the best <b>urban environment</b> and a unique <b>urban life</b>.</p> <p>Goals related to Green and Blue Capital, World best city for cyclists, carbon neutral capital, clean and healthy city. Almanac (n.d.); Holm Carlsen (2014).</p> <p>D3: A <b>living laboratory</b> for testing smart <b>technologies</b> to address the challenges of <b>urbanization</b> and <b>climate change</b>. Unique access to <b>data</b> and <b>efficient public-private sector partnerships</b> to attract many multinationals. (Copenhagen Capacity, n.d.) T3: <b>Living Lab</b> V3: not found.</p> | <p>Fields: Environment, Governance, Living, People</p> <p>Goal: Efficiency, Sustainability, Quality of Life</p> <p>TA: Technology, Connection</p> <p>Other: Living Laboratory, Data, PPP, Stakeholders</p> <p>Digital Platforms to Engage Citizens:</p> <p>Copenhagen Solutions Lab</p> <p>Copenhagen Citizen Service</p> <p>Copenhagen City Data Exchange</p> <p>WeSolve Better Together site and App</p> <p>Open Data DK<br/>Opendata.dk/<br/>City-of-copenhagen</p> | <p>Copenhagen Solutions Lab</p> <p>Copenhagen Living Lab</p> <p>Copenhagen Street Lab</p> <p>DOLL Living Lab</p> <p>EnergyLab Nordhavn</p> <p>Energy &amp; Water - Greater Copenhagen Living Lab</p> <p>Living Lab Strandvejen</p> |



AMAZON FEDERAL UNIVERSITY – FACULTY OF TECHNOLOGY



| Rank and Initiatives                                                                                                                                                                                                                      | Smart City Definition (D), Type (T), and Vision(V)                                                                                                                                                                                                                                                                                                                                                                                                                                                                                                                                                                                                                                                                               | Terms and Digital Platforms                                                                                                                                                                                                                                                                                               | Fab, Living or Urban Labs                                                                                  |
|-------------------------------------------------------------------------------------------------------------------------------------------------------------------------------------------------------------------------------------------|----------------------------------------------------------------------------------------------------------------------------------------------------------------------------------------------------------------------------------------------------------------------------------------------------------------------------------------------------------------------------------------------------------------------------------------------------------------------------------------------------------------------------------------------------------------------------------------------------------------------------------------------------------------------------------------------------------------------------------|---------------------------------------------------------------------------------------------------------------------------------------------------------------------------------------------------------------------------------------------------------------------------------------------------------------------------|------------------------------------------------------------------------------------------------------------|
| <p><b>8<sup>th</sup> Oslo (NO)</b><br/><br/>(?)<br/><br/>Not found organized information</p>                                                                                                                                              | <p>D: An <b>urban area</b> that has become more <b>efficient</b> and/or more <b>environmentally</b> friendly and/or more socially <b>inclusive</b> using <b>digital technologies</b> (Nordic Smart City Network, 2021 p. 6)<br/><br/>T: <b>Open, Connected, Sustainable, and Innovative</b><br/><br/>V: It is an <b>urban development vision</b> to improve the <b>lives of citizens</b> by being <b>open, connected, sustainable, and innovative</b>. (Nordic Smart City Network, n.d.)</p>                                                                                                                                                                                                                                     | <p>Fields: Economy, Environment, Living, People.<br/>Goal: Efficiency, Sust., QoL<br/>TA: Connection, Tec.<br/>Others: Open, Innovation, Digital.<br/>Digital platforms: Futurebuilt, Urban Sharing, Oslo Toll Ring<br/>Smart Oslo Accelerator<br/>Oslo Statistics Bank<br/>statistikkbanken.oslo.kommune.no/webview/</p> | <p>Living Lab<br/>Vollebekk<br/><br/>Oslo Living Lab<br/><br/>Smart Security Lab</p>                       |
| <p><b>9<sup>th</sup> Vienna (AT)</b><br/><br/>Since 2011:<br/>The Big Smart City Wien Initiative<br/><br/>Since 2014:<br/>Smart City Wien Framework Strategy<br/><br/>Reviewed 2022:<br/>Smart Climate City Strategy<br/>Vienna Local</p> | <p>D1: A <b>city</b> that faces the challenges in the wake of decreasing <b>resource</b> consumption combined with rising <b>demands</b> (Stadt Wien, 2015 p. 6).<br/><br/>T1: <b>Livable</b> City; V1: In 2050, Vienna is a <b>vibrant metropolis</b> and one of Europe’s most <b>attractive cities</b>. Goals: To offer optimum <b>quality of life</b>, combined with the highest possible preservation of resources, to all <b>citizens</b>. This can be achieved through comprehensive <b>innovations</b>. (Stadt Wien, 2015 p. 16 and p. 19).<br/><br/>D2: The smart city never loses sight of the “<b>human dimension</b>”; a city that places the focus on the needs of the <b>local people</b>. The development of a</p> | <p>Fields: Environment, Living, People<br/><br/>Goal: Sustainability, QoL<br/><br/>TA: Technologies<br/>Others: Resource Conservation, Social Innovation, Technical Innovation<br/><br/>Digital platforms:<br/>The Smart City Wien<br/>websi+B24te<br/><br/>junges.wien.gv.at</p>                                         | <p>Aspern Smart City Living Lab<br/><br/>Siemens Living Lab Process Industries<br/><br/>Smart City Lab</p> |



AMAZON FEDERAL UNIVERSITY – FACULTY OF TECHNOLOGY



|                                                                                                                       |                                                                                                                                                                                                                                                                                                                                                                                                                                                                                                                                                                                                                                                                                                                                                                                     |                                                                                                                                                                                                                                                                                                                                                                    |                                                                            |
|-----------------------------------------------------------------------------------------------------------------------|-------------------------------------------------------------------------------------------------------------------------------------------------------------------------------------------------------------------------------------------------------------------------------------------------------------------------------------------------------------------------------------------------------------------------------------------------------------------------------------------------------------------------------------------------------------------------------------------------------------------------------------------------------------------------------------------------------------------------------------------------------------------------------------|--------------------------------------------------------------------------------------------------------------------------------------------------------------------------------------------------------------------------------------------------------------------------------------------------------------------------------------------------------------------|----------------------------------------------------------------------------|
|                                                                                                                       | <p><b>sustainable and livable city</b> is only successful if everyone benefits, and everyone is able to play their part.</p> <p>T2: <b>Sustainable, Livable City</b></p> <p>V2: a city where <b>life</b> is good, but not at the <b>expense</b> of the <b>environment</b> and thus of <b>future generations</b>. Vienna uses the opportunities that <b>social innovations</b> and <b>new technologies</b> bring with them actively and prudently to achieve the goals. (Stadt Wien, 2020; 2022p 21)</p>                                                                                                                                                                                                                                                                             | <p>ALBin Project</p> <p>Digital School project</p> <p>The Vienna City Bike System</p> <p>MA 48 Waste App</p> <p>Open Government Data (OGD) Wien Platform<br/>digitales.wien.gv.at/<br/>open-data/</p>                                                                                                                                                              |                                                                            |
| <p>10<sup>th</sup><br/>Washington,<br/>D.C.<br/>(USA)</p> <p>Since 2016:<br/>Smart DC<br/>Initiative<br/>National</p> | <p>D: One in which <b>information and communication technology</b> facilitates improved insight into and control over the various <b>systems</b> that affect the <b>lives of residents</b>. (Cuddy et al., 2014).</p> <p>T: <b>Connected City</b></p> <p>V: A <b>city</b> to <b>connect</b> its <b>communities</b>, build <b>economic</b> strength, protect the natural <b>environment</b>, and maintain the safety and security of its <b>infrastructure</b>.</p> <p>Goal: to become a <b>connected</b> city that benefits all components of the <b>transportation systems—agencies, users</b>, and infrastructure—and that the transportation systems support the district’ systems and broader goals (Washington District Department of Transportation, 2016 p. 1 and p. 25)</p> | <p>Fields: Economy, Environment, Mobility, People.</p> <p>Goal: Efficiency, Sustainability</p> <p>TA: Connection, ICT</p> <p>Other: Infrastructure, Transportation System</p> <p>Digital Platforms to Engage Citizens:<br/>OCTO website<br/>311DC App<br/>My DC Water App<br/>Washington Open Data<br/><a href="https://data.wa.gov/">https://data.wa.gov/</a></p> | <p>The Lab @ DC</p> <p>UrbanPlan</p> <p>Virginia Tech Urban Living Lab</p> |





AMAZON FEDERAL UNIVERSITY – FACULTY OF TECHNOLOGY



| Rank and Initiatives                                                                                                                                                                                     | Smart City Definition (D), Type (T), and Vision(V)                                                                                                                                                                                                                                                                                                                                                                                                                                                                                                                                                                         | Terms and Digital Platforms                                                                                                                                                                                                                                                                                                                                                                                                                                                             | Fab, Living or Urban Labs                                                                                             |
|----------------------------------------------------------------------------------------------------------------------------------------------------------------------------------------------------------|----------------------------------------------------------------------------------------------------------------------------------------------------------------------------------------------------------------------------------------------------------------------------------------------------------------------------------------------------------------------------------------------------------------------------------------------------------------------------------------------------------------------------------------------------------------------------------------------------------------------------|-----------------------------------------------------------------------------------------------------------------------------------------------------------------------------------------------------------------------------------------------------------------------------------------------------------------------------------------------------------------------------------------------------------------------------------------------------------------------------------------|-----------------------------------------------------------------------------------------------------------------------|
| <p><b>11<sup>th</sup> Zurich (ZH)</b></p> <p>Since 2018:<br/>Strategic Smart City Zürich<br/>Local Initiative</p>                                                                                        | <p>D: A city that <b>connects people, organizations, and infrastructure</b> in such a way that <b>social, ecological, and economic</b> added value is created. The <b>networking of data, sensors, and applications</b> allows new and more <b>efficient solutions</b> for the <b>users</b> of urban infrastructures, as well as for those who operate them. Good <b>networking</b> with the <b>population</b> strengthens opportunities for <b>participation</b> and contact with the <b>administration</b> (Zurich City, 2018 p. 4)</p> <p>T: <b>Connected, Collaborative, and Digital City</b></p> <p>V: Not found.</p> | <p>Fields: Economy, Env., Governance, Living, People<br/>Goal: Efficiency, Sustainability, QoL<br/>TA: Connection, ICT, Technology<br/>Other: Applications, Data, Stakeholders, Networking, Sensor, Collaborative</p> <p>Digital platforms:<br/>The Smart City Zurich website, City Lab, The Zurich Pedestrian Navigation System, Pikmi on-demand transport service, ZüriMobil app, My account, Zurich Open Data <a href="http://data.stadt-zuerich.ch/">data.stadt-zuerich.ch/</a></p> | <p>Reallabor<br/>Hunziker Areal<br/>Hunziker Areal<br/>Living Lab<br/>Smart City Lab</p>                              |
| <p><b>12<sup>th</sup> Berlin (DE)</b></p> <p>Since 2015:<br/>Smart City Strategy Berlin<br/>2017:<br/>Launch of Smart City Charter:<br/>Making Digital Transformation at the local level sustainable</p> | <p>D1: <b>Cities</b> which achieve a significantly higher or stable <b>quality of life</b> while using the same or a lower level of <b>resources</b>. This can only be achieved by means of an <b>urban management</b> which, by using <b>innovative information and communication technologies...</b></p> <p>T1: Smart Administration, E-Government</p>                                                                                                                                                                                                                                                                   | <p>Fields: Economy, Environment, Governance, Living, People<br/>Goal: Efficiency, Sustainability, QoL<br/>TA: Connection, ICT, Technology<br/>Other: Digital, Integration, Network, Resources, Urban Management, Innovation, Cooperative, Resilient, Open,</p>                                                                                                                                                                                                                          | <p>CityLAB Berlin,<br/>Citizens Create<br/>Climate Knowledge<br/>Climate Art Lab<br/>EUREF Campus<br/>My-Co Place</p> |



|                                                                                                                                                                                 |                                                                                                                                                                                                                                                                                                                                                                                                                                                                                                                                                                                                                                                                                                                                                                                                                                                                                                                                      |                                                                                                                                                                                                                                                                                        |                |
|---------------------------------------------------------------------------------------------------------------------------------------------------------------------------------|--------------------------------------------------------------------------------------------------------------------------------------------------------------------------------------------------------------------------------------------------------------------------------------------------------------------------------------------------------------------------------------------------------------------------------------------------------------------------------------------------------------------------------------------------------------------------------------------------------------------------------------------------------------------------------------------------------------------------------------------------------------------------------------------------------------------------------------------------------------------------------------------------------------------------------------|----------------------------------------------------------------------------------------------------------------------------------------------------------------------------------------------------------------------------------------------------------------------------------------|----------------|
| <p>2021<br/>Strategic<br/>framework Smart<br/>City Berlin<br/><br/>Since 2022:<br/>Digital Together:<br/>Berlin<br/>Strategy<br/><br/>UE, Private and<br/>Local Initiatives</p> | <p><b>V1 (?): Smart Berlin is both a place to live and an economic area which develops sustainably through the systematic and intermodal deployment of innovative technologies, materials, and services...</b> (Berlin Senate Department for Urban Development and the Environment, 2015 p. 5)<br/><br/>D2: Smart city is <b>Livable, Lovable, Diverse, Open, Participatory, Inclusive, Climate neutral, Resource efficient, Competitive, Open-Minded, Innovative, Responsive, Sensitive, Safe, and freedom enhancing</b> city. (BBSR and BMUB, 2017 p. 25)<br/><br/>D3: "smart" means tackling challenges <b>sustainably</b>, with a focus on the common good and working <b>collaboratively</b>, and all the while shaping change processes in a <b>resilient</b> manner.<br/><br/>T2: <b>Livable, Digital</b><br/><br/>V2: A <b>sustainable, community-oriented, resilient and cooperative</b> city (Berlin State, n.d; 2022)</p> | <p>Inclusive<br/><br/>Digital Platforms to Engage<br/>Citizens:<br/><br/>Berlin.de<br/><br/>Berlin App<br/><br/>Berlin Citizen Participation<br/>Platform<br/><br/>Berlin Living Lab<br/><br/>Open Data Berlin<br/><a href="https://daten.berlin.de/">https://daten.berlin.de/</a></p> | <p>SAI-Lab</p> |
|---------------------------------------------------------------------------------------------------------------------------------------------------------------------------------|--------------------------------------------------------------------------------------------------------------------------------------------------------------------------------------------------------------------------------------------------------------------------------------------------------------------------------------------------------------------------------------------------------------------------------------------------------------------------------------------------------------------------------------------------------------------------------------------------------------------------------------------------------------------------------------------------------------------------------------------------------------------------------------------------------------------------------------------------------------------------------------------------------------------------------------|----------------------------------------------------------------------------------------------------------------------------------------------------------------------------------------------------------------------------------------------------------------------------------------|----------------|



AMAZON FEDERAL UNIVERSITY – FACULTY OF TECHNOLOGY



| Rank and Initiatives                                                                                                                                                                       | Smart City Definition (D), Type (T), and Vision(V)                                                                                                                                                                                                                                                                                                                                                                                                                                                                                                                                                                                                                         | Terms and Digital Platforms                                                                                                                                                                                                                                                                                                                                                            | Fab, Living or Urban Labs                                                                                                             |
|--------------------------------------------------------------------------------------------------------------------------------------------------------------------------------------------|----------------------------------------------------------------------------------------------------------------------------------------------------------------------------------------------------------------------------------------------------------------------------------------------------------------------------------------------------------------------------------------------------------------------------------------------------------------------------------------------------------------------------------------------------------------------------------------------------------------------------------------------------------------------------|----------------------------------------------------------------------------------------------------------------------------------------------------------------------------------------------------------------------------------------------------------------------------------------------------------------------------------------------------------------------------------------|---------------------------------------------------------------------------------------------------------------------------------------|
| <p><b>13<sup>th</sup> Sydney (AU)</b></p> <p>Since 2020: Smart City Strategy Framework</p> <p>Digital strategy</p> <p>Local Initiative</p>                                                 | <p>D: Is one that uses <b>information and communications technology</b> to enhance its <b>livability, workability, and sustainability</b>. (City of Sydney, 2020 p. 55; Bane, 2022)</p> <p>T1: <b>Dynamic, Digital, Responsive</b></p> <p>V1: Its vision is a <b>dynamic, responsive city</b>, harnessing <b>technology and data</b> to enable <b>collaborative innovation</b> and create a thriving, <b>inclusive</b>, and <b>resilient</b> future for all. (City of Sydney, 2020a p. 12)</p> <p>T2: <b>Innovative, Livable</b></p> <p>V2: Sydney to continue to be one of the most <b>innovative</b> and <b>livable</b> cities in the world. (City of Sydney, 2020b)</p> | <p>Fields: Governance, Living, Economy, Environment</p> <p>Goal: Sustainability QoL</p> <p>TA: ICT. Technology</p> <p>Other: Data, Collaborative, Resilient, Innovation, Work</p> <p>Digital platforms:<br/>Sydney Your Say website,<br/>City of Sydney Data hub, The City of Sydney App,<br/>cityofsydney.nsw.gov.au<br/>City of Sydney Data Hub<br/>data.cityofsydney.nsw.gov.au</p> | <p>Intergener8</p> <p>Living Lab</p> <p>Infosys Sydney Living Lab</p> <p>Sydney Science Park Living</p> <p>CSIRO Urban Living Lab</p> |
| <p><b>14<sup>th</sup> Taipei (Taiwan)</b></p> <p>In 2008: The Institute for Information Policy established Living Lab</p> <p>In 2013: Won IBM SCC</p> <p>Since 2016: Taipei Smart City</p> | <p>D: <b>Government as a Platform; City as a Living Lab</b>, focusing on one core vision (<b>Livable+Sustainable</b>) plus seven fields: Smart <b>Security, Building, Transportation, Education, Health, Environment, and Economy</b>. (Taipei City Government, n.d.)</p> <p>T: <b>Platform, Living Lab</b></p> <p>V: As part of National Vision: Smart <b>technologies</b> are applied to solve the pain points of <b>local government</b></p>                                                                                                                                                                                                                            | <p>Fields: Economy, Environment, Governance, Living, Mobility, People.</p> <p>Goal: Efficiency, Sustainability, QoL</p> <p>TA: Information, Technology</p> <p>Other: Innovation, Stakeholders (PPP), Security, Living Lab, Platform</p> <p>Digital platforms:<br/>Living Lab, Tapei Navi, Taipei CooC-Cloud, The Taipei Smart Parking System, Smart Taipei</p>                         | <p>Fablab Dynamic</p> <p>Taipei Smart City Living Lab</p> <p>JCA Living Lab</p>                                                       |



AMAZON FEDERAL UNIVERSITY – FACULTY OF TECHNOLOGY



|                                                                                                                                                                                                                                                                                                                                      |                                                                                                                                                                                                                                                                                                                                                                                                                                                                                                                                                                                                                                                                                                                                                                                                              |                                                                                                                                                                                                                                                                                                                                                                                                 |                                                                                                                                                                                                                                                                              |
|--------------------------------------------------------------------------------------------------------------------------------------------------------------------------------------------------------------------------------------------------------------------------------------------------------------------------------------|--------------------------------------------------------------------------------------------------------------------------------------------------------------------------------------------------------------------------------------------------------------------------------------------------------------------------------------------------------------------------------------------------------------------------------------------------------------------------------------------------------------------------------------------------------------------------------------------------------------------------------------------------------------------------------------------------------------------------------------------------------------------------------------------------------------|-------------------------------------------------------------------------------------------------------------------------------------------------------------------------------------------------------------------------------------------------------------------------------------------------------------------------------------------------------------------------------------------------|------------------------------------------------------------------------------------------------------------------------------------------------------------------------------------------------------------------------------------------------------------------------------|
| <p>Project Management Office<br/>Since: 2020<br/>Taipei Smart City 1+7 Framework<br/>National, Local and Private Initiative</p>                                                                                                                                                                                                      | <p>and <b>civilians</b>, boost cross-domain <b>industry collaboration</b>, and achieve local and industrial <b>innovation</b>.<br/>(Taiwan Ministry of Digital Affairs, n.d.)</p>                                                                                                                                                                                                                                                                                                                                                                                                                                                                                                                                                                                                                            | <p>website, Open Platform for Government Information of the New Taipei City.<br/><a href="https://data.ntpc.gov.tw/">https://data.ntpc.gov.tw/</a><br/>Taipei City Data Big Platform<br/><a href="https://data.taipei/">https://data.taipei/</a></p>                                                                                                                                            | <p>Living Lab +</p>                                                                                                                                                                                                                                                          |
| <p><b>15<sup>th</sup>) Barcelona (ES)</b><br/><br/>Since 2000:<br/>22@Barcelona Project<br/>2008Urban Lab<br/><br/>Since 2011:<br/>IT Strategy aligned to EU<br/>Horizon Strategy<br/>Smart City Strategy<br/>Smart City Expo and World Congress<br/><br/>Since 2015:<br/>Barcelona Digital City Plan<br/>EU, Local, and Private</p> | <p>D1 and V1: ‘To become a <b>self-sufficient city</b> of <b>productive neighborhoods</b> at <b>human</b> speed, within a <b>hyper-connected zero emissions</b> metropolitan area’ (Olivella, 2012; Ferrer, 2017 p. 73; T. Miao and Phelps, 2019 p. 14)<br/><br/>T1: Self-sufficient, hyperconnected, urban lab<br/><br/>D: Not found<br/><br/>T2: <b>Digital, Sovereign City</b><br/><br/>V2: not clear, but there is this declaration: Barcelona aspires to evolve the Smart City Agenda towards becoming a <b>digital sovereign</b> city, empowering <b>citizens</b> to discuss and articulate their own priorities, set direction, and decide upon ethical uses of <b>technological innovations</b> with clear <b>social</b> impact and <b>public</b> return.<br/>(Ajuntament Barcelona, 2019 p. 5).</p> | <p>Fields: Economy, Governance, People, Environment<br/><br/>Goal: Efficiency, Sustainability, QoL<br/><br/>TA: Connection, Technology<br/><br/>Others: Innovation, City, Stakeholders<br/><br/>Digital platforms:<br/>Aplicaciones.bcn<br/>Barcelona in your pocket<br/>Decidim Barcelona<br/>Governance Model<br/>Participa.barcelona<br/>Wesolve – Better Together app<br/>Open Data BCN</p> | <p>City Lab<br/>Barcelona<br/><br/>Fab City Hub<br/>Barcelona<br/><br/>Fab Lab<br/>Barcelona<br/><br/>Data City Lab<br/><br/>22@LIVING<br/>Lab<br/><br/>The Healthcare<br/>Living Lab<br/>Catalonia<br/>(HCLLC)<br/><br/>The Library<br/>Living Lab –<br/>Barcelona (L3)</p> |



AMAZON FEDERAL UNIVERSITY – FACULTY OF TECHNOLOGY



| Rank and Initiatives                                                                                                                                                                                                                                                                                                                   | Smart City Definition (D), Type (T), and Vision(V)                                                                                                                                                                                                                                                                                                           | Terms and Digital Platforms                                                                                                                                                                                                                                                                                                                                                                                                                                                                                                                                                                      | Fab, Living or Urban Labs                                                                                                |
|----------------------------------------------------------------------------------------------------------------------------------------------------------------------------------------------------------------------------------------------------------------------------------------------------------------------------------------|--------------------------------------------------------------------------------------------------------------------------------------------------------------------------------------------------------------------------------------------------------------------------------------------------------------------------------------------------------------|--------------------------------------------------------------------------------------------------------------------------------------------------------------------------------------------------------------------------------------------------------------------------------------------------------------------------------------------------------------------------------------------------------------------------------------------------------------------------------------------------------------------------------------------------------------------------------------------------|--------------------------------------------------------------------------------------------------------------------------|
| <p><b>16<sup>th</sup> Toronto (CA)</b><br/>           In 2016: TRBoT created the Smart Cities Working Group<br/>           In 2017, the Canada Government launched the Smart City Challenge<br/>           In 2018: Toronto Smart City Challenge Submission Connected Community Smart City Project (?)</p> <p>National &amp; Local</p> | <p>D: Is a <b>city</b> that improves access to <b>information</b> and <b>data</b>, to help it become an <b>economically, socially, and environmentally connected community</b>. (City of Toronto, 2017).</p> <p>T: <b>Connected Community</b></p> <p>V: not found</p>                                                                                        | <p>Fields: Economy, People, Environment<br/>           Goal: Efficiency, Sustainability, QoL<br/>           TA: Connection, Information<br/>           Other: City, Data<br/>           Digital platforms:<br/>           ConnectTO program<br/>           The City of Toronto website, the Trip Planner app, The MyWaterToronto Portal,<br/>           The 311 Toronto App, Cowlines App, Cycle Now app, Garbage Day App, Transit App,<br/>           Toronto Open Data<br/> <a href="https://open.toronto.ca/">https://open.toronto.ca/</a><br/>           Open Data Master Plan 2018-2022</p> | <p>Future Living Lab<br/>           Google Quayside Sidewalk Toronto<br/>           University of Toronto Living Lab</p> |
| <p><b>17<sup>th</sup> Paris (FR)</b><br/>           Since 2010: Urban Lab<br/>           Since 2015: Paris Smart and Sustainable Plan – Looking ahead to 2020&amp;Beyond</p>                                                                                                                                                           | <p>D: A City that develops common services, <b>applications</b>, and <b>goods</b> that meet the <b>basic needs</b> of its <b>inhabitants</b> and their quest for <b>well-being</b>. It is an <b>innovative</b> approach based on a medium and long-term global and systemic vision of the city to <b>improve the quality of life</b> by leveraging three</p> | <p>Fields: Economy, People, Environment, Governance, Living<br/>           Goal: Sustainability, QoL<br/>           TA: Connection, Technology</p>                                                                                                                                                                                                                                                                                                                                                                                                                                               | <p>Agrilink<br/>           3E-Paris<br/>           Periurban Lab<br/>           La Fabrique du Futur</p>                 |



AMAZON FEDERAL UNIVERSITY – FACULTY OF TECHNOLOGY



|                                                                                                                                                                             |                                                                                                                                                                                                                                                                                                                                                                                                                                                                                                                                                                                                                                                                                                                                                                                                             |                                                                                                                                                                                                                                                                |                                                                                                                                    |
|-----------------------------------------------------------------------------------------------------------------------------------------------------------------------------|-------------------------------------------------------------------------------------------------------------------------------------------------------------------------------------------------------------------------------------------------------------------------------------------------------------------------------------------------------------------------------------------------------------------------------------------------------------------------------------------------------------------------------------------------------------------------------------------------------------------------------------------------------------------------------------------------------------------------------------------------------------------------------------------------------------|----------------------------------------------------------------------------------------------------------------------------------------------------------------------------------------------------------------------------------------------------------------|------------------------------------------------------------------------------------------------------------------------------------|
| <p>Local and Private Initiative</p>                                                                                                                                         | <p>major catalysts to transform <b>urban life</b>: deepening social ties and <b>creating value</b>, rethinking <b>urban infrastructures</b>, and capitalizing on <b>technological</b> revolutions, especially <b>digital technologies</b>. (Mairie de Paris, 2015 p. 5)</p> <p>T: <b>Connected, Open, Sustainable</b> City</p> <p>V: Our vision of <b>Smart and Sustainable</b> Paris is based on three major pillars: the <b>open city</b>., the <b>connected city</b> and the <b>sustainable city</b>. Each one of these brings value and resources to the comprehensive approach that will help develop the new trajectory of this 21st-century metropolis. <b>Data</b> use and <b>governance</b> will also influence these three dimensions for the city of tomorrow. (Mairie de Paris, 2015 p. 25)</p> | <p>Other: Open City, Applications, Data</p> <p>Digital Platforms to Engage Citizens:</p> <p>Budget Participatif</p> <p>Data.gouv.fr</p> <p>Réinventer Paris</p> <p>Open Data Paris<br/><a href="https://opendata.paris.fr/">https://opendata.paris.fr/</a></p> | <p>Liberté Living Lab</p> <p>Le Rosa Lab – Fabrique de La Ville Creative et Durable</p> <p>Universcience Living Lab</p>            |
| <p><b>18<sup>th</sup> Madrid (ES)</b></p> <p>Since 2015: Madrid Intelligence Project (MiNT)</p> <p>Since 2022: Madrid Digital Capital - Transformation Strategy for the</p> | <p>D: Holistic vision of a <b>city</b> that applies <b>ICTs</b> to improve the <b>quality of life</b> and accessibility of its <b>inhabitants</b> and ensures <b>sustainable economic, social and environmental development</b> in permanent improvement. (MINETAD, 2015 p. 3)</p> <p>In partnership with IBM, in 2015, Madrid Intelligence Project (MiNT) was implemented to improve <b>urban services</b> and the <b>quality of citizens'</b></p>                                                                                                                                                                                                                                                                                                                                                         | <p>Fields: Economy, People, Environment, Governance, Living, People</p> <p>Goal: Efficiency, Sustainability, QoL</p> <p>TA: ICTs, Technology</p> <p>Other: Open, Inclusive, Digital Transformation</p>                                                         | <p>Madrid International Lab</p> <p>The Internet of Things Laboratory of the City of Madrid (IoTMADLab)</p> <p>Madrid Urban Lab</p> |



AMAZON FEDERAL UNIVERSITY – FACULTY OF TECHNOLOGY



|                                                                                                                                                                             |                                                                                                                                                                                                                                                                                                                                                                                                                                                                                                                                                                                                                                                                                                                                                                                             |                                                                                                                                                                                                                                                                                                                                                                                                                              |                                                                                                                                   |
|-----------------------------------------------------------------------------------------------------------------------------------------------------------------------------|---------------------------------------------------------------------------------------------------------------------------------------------------------------------------------------------------------------------------------------------------------------------------------------------------------------------------------------------------------------------------------------------------------------------------------------------------------------------------------------------------------------------------------------------------------------------------------------------------------------------------------------------------------------------------------------------------------------------------------------------------------------------------------------------|------------------------------------------------------------------------------------------------------------------------------------------------------------------------------------------------------------------------------------------------------------------------------------------------------------------------------------------------------------------------------------------------------------------------------|-----------------------------------------------------------------------------------------------------------------------------------|
| <p>City of Madrid</p> <p>Private, Local and UE</p>                                                                                                                          | <p><b>services</b>, to make the city more <b>sustainable</b> (IBM, 2014).</p> <p>T: An <b>Open, Inclusive, Digital</b>, and <b>Sustainable City</b></p> <p>V: a strategy to continue being a city benchmark in the <b>digital</b> field, designed for all <b>people</b> and <b>companies</b> that are part of Madrid, for its neighborhoods and districts, and for the City Council itself, as a key driver of the <b>digital transformation</b> of the capital (Ayuntamiento de Madrid, 2022 p. 4-7)</p>                                                                                                                                                                                                                                                                                   | <p>Digital Platforms to Engage Citizens:</p> <p>Decide Madrid</p> <p>Getafe Participa</p> <p>SmartAppCity</p> <p>Open Data Madrid Portal</p> <p><a href="https://datos.madrid.es/portal/site/egob/">datos.madrid.es/portal/site/egob/</a></p>                                                                                                                                                                                | <p>Observatorio de La Ciudad</p> <p>The Madrid Smart Lab</p>                                                                      |
| <p><b>19<sup>th</sup> Busan (SK)</b></p> <p>In 2017: won IBM SCC</p> <p>Since 2018: Busan Eco Delta City: A National Smart City Project</p> <p>Local, Private, National</p> | <p>Not found a local definition, but national.</p> <p>D1: A <b>platform</b> to improve the <b>quality of life</b> for <b>citizens</b>, enhance the <b>sustainability</b> of cities, and foster <b>new industries</b> by utilizing <b>innovative technologies</b> of the <b>4<sup>th</sup> Industrial Revolution</b> era. (South Korea Ministry of Land, Infrastructure and Transport, 2019 p. 5)</p> <p>T: <b>Digital, Augmented, and Robotic City</b> (Busan Metropolitan City, n.d.)</p> <p>Definition of the project: Three (<b>Digital, Augmented, and Robotic City</b>) future city operation platforms, where all <b>citizens</b> will benefit from balanced opportunities and <b>inclusive growth</b> as a mecca of the <b>future industry</b> and improve the <b>quality of</b></p> | <p>Fields: Economy, Environment, Governance, Living, People</p> <p>Goal: Efficiency, Sustainability, QoL</p> <p>TA: Technology</p> <p>Other: Platform, Innovation, Digital, Augmented, Robot, 4<sup>th</sup> Industrial Revolution, International Leadership</p> <p>Digital Platforms to Engage Citizens:</p> <p>Busan Eco Delta Smart City Portal</p> <p><a href="http://www.busan.go.kr/eng/">www.busan.go.kr/eng/</a></p> | <p>Busan Innovation Fab Lab</p> <p>Busan EDC Village</p> <p>Busan's IoT Living Lab</p> <p>Busan Network of Living Lab (BNoLL)</p> |



AMAZON FEDERAL UNIVERSITY – FACULTY OF TECHNOLOGY



|                                                                                                                                                                                                                                                                                                                  |                                                                                                                                                                                                                                                                                                                                                                                                                                                                                                                                                                                                                                                                                                                                     |                                                                                                                                                                                                                                                                                                                                                                                                                            |                                                                                                                                                |
|------------------------------------------------------------------------------------------------------------------------------------------------------------------------------------------------------------------------------------------------------------------------------------------------------------------|-------------------------------------------------------------------------------------------------------------------------------------------------------------------------------------------------------------------------------------------------------------------------------------------------------------------------------------------------------------------------------------------------------------------------------------------------------------------------------------------------------------------------------------------------------------------------------------------------------------------------------------------------------------------------------------------------------------------------------------|----------------------------------------------------------------------------------------------------------------------------------------------------------------------------------------------------------------------------------------------------------------------------------------------------------------------------------------------------------------------------------------------------------------------------|------------------------------------------------------------------------------------------------------------------------------------------------|
|                                                                                                                                                                                                                                                                                                                  | <p><b>life of citizens, including education, culture, safety, and environment</b> (South Korea Ministry of Land, Infrastructure, and Transport, 2021).</p> <p>V: a place of <b>innovative and international leadership</b> for future <b>living</b> where <b>nature, people and technology</b> come together.</p>                                                                                                                                                                                                                                                                                                                                                                                                                   | <p>ecodelta01</p> <p>Busan Open Data Portal<br/>data.busan.go.kr/</p> <p>Busan Metropolitan City Big Data Platform<br/>bigdata.busan.go.kr/</p> <p>City-Bot</p>                                                                                                                                                                                                                                                            |                                                                                                                                                |
| <p><b>20<sup>th</sup> Dublin (IE)</b></p> <p>Since 2012:</p> <p>Intel Labs</p> <p>Europe, Dublin</p> <p>City Council and Trinity College start Sustainable Connected Cities</p> <p>In 2014: Won IBM Smart City Challenge</p> <p>Since 2016:</p> <p>Smart Dublin Program</p> <p>Local and Private Initiatives</p> | <p>D: A <b>real-time, connected, and data-driven city</b>. (Smart Dublin, n.d. p. 3)</p> <p>T: <b>Open, Connected, and Engaged</b> City.</p> <p><b>Open</b> to promote <b>economic development</b> through <b>open data, open government, and open innovation</b>.</p> <p><b>Connected</b> to drive <b>efficiencies</b> through connected <b>networks, connected infrastructure, and connected city region</b>. Engaged to <b>engage with entrepreneurs, citizens, researchers, and business</b> to solve city region challenges.</p> <p>(Dublin City Council, n.d. p. 2)</p> <p>V: To be a world leading <b>open, connected, and engaged Smart City Region</b> to <b>live in, work in and visit</b>. (Smart Dublin, n.d. p. 6)</p> | <p>Fields: Economy, Governance, Living, People</p> <p>Goal: Efficiency, QoL</p> <p>TA: Connection, Data, Innovation</p> <p>Other: Real-time, Data Driven, Open, Engage</p> <p>Digital Platforms to Engage Citizens:</p> <p>Smart Dublin website</p> <p>Dublin Dashboard</p> <p>Smart Dublin Public Trello Board</p> <p>See.Sense</p> <p>Smart Dublin Challenges</p> <p>Open Data Dublinlinked<br/>data.smartdublin.ie/</p> | <p>I-CHANGE</p> <p>Dublin Living Lab University College Dublin (UCD)</p> <p>iSCAPE Dublin Living Lab</p> <p>Dublin Coastal City Living Lab</p> |





AMAZON FEDERAL UNIVERSITY – FACULTY OF TECHNOLOGY



| Rank and Initiatives                                                                                                                                                                                                                                  | Smart City Definition (D), Type (T), and Vision(V)                                                                                                                                                                                                                                                                                                                                                                                                                                                                                                                                                                                                                                             | Terms and Digital Platforms                                                                                                                                                                                                                                                                                                                                                                                                  | Fab, Living or Urban Labs                                                                                                                        |
|-------------------------------------------------------------------------------------------------------------------------------------------------------------------------------------------------------------------------------------------------------|------------------------------------------------------------------------------------------------------------------------------------------------------------------------------------------------------------------------------------------------------------------------------------------------------------------------------------------------------------------------------------------------------------------------------------------------------------------------------------------------------------------------------------------------------------------------------------------------------------------------------------------------------------------------------------------------|------------------------------------------------------------------------------------------------------------------------------------------------------------------------------------------------------------------------------------------------------------------------------------------------------------------------------------------------------------------------------------------------------------------------------|--------------------------------------------------------------------------------------------------------------------------------------------------|
| <p><b>21<sup>st</sup>) Melbourne (AU)</b></p> <p>In 2015: Won IBM Smart City Challenge</p> <p>In 2021: Economic Development Strategy 2031</p> <p>Community Engagement Policy Melbourne neighborhood planning framework</p> <p>Local &amp; Private</p> | <p>D: Not found.</p> <p>T: City as a <b>System</b> (ARUP, 2010 p. 12). A <b>City Lab</b> (City of Melbourne, n.d.)</p> <p>V: To enhance the aspects of our <b>city</b> that make us <b>uniquely</b> Melbourne, and <b>intelligently</b> prepare for the changing needs of the <b>community</b>, the <b>environment</b>, and the <b>economy</b>. (City of Melbourne, n.d.)</p> <p>T2: <b>Digitally Connected</b> City, adapting to connectivity as a <b>knowledge-enabled Smart City</b></p> <p>V2: By 2031 the City of Melbourne will be a <b>global leader</b> in creating <b>jobs</b> and <b>enterprises</b> that focus on the needs of the future.</p> <p>City of Melbourne (2021 p. 6)</p> | <p>Fields: Economy, Environment, People</p> <p>Goal: Efficiency, Sustainability, QoL</p> <p>TA: Technology, Connected</p> <p>Other: City, Innovation, Open Data, System</p> <p>Digital platforms: Participedia, CityLab</p> <p>FreeWifi, Melbourne Conversations, Neighborhood Portals</p> <p><a href="http://bit.ly/3YgrXoz">http://bit.ly/3YgrXoz</a></p> <p>Melbourne Open Data data.melbourne.vic.gov.au/pages/home/</p> | <p>Future Self and Design Living Lab</p> <p>Infosys Melbourne Living Lab</p> <p>RMIT Healthy Liveable Cities Lab</p> <p>Swinburne Living Lab</p> |
| <p><b>22nd) Los Angeles (USA)</b></p> <p>Since 2020 SmartLA 2028 strategy</p> <p>Local and Private Initiative</p>                                                                                                                                     | <p>D: Is one that <b>efficiently</b> and <b>ethically</b> uses secure <b>technologies, data, &amp; resources</b> to improve <b>quality of life</b> and <b>sustainability</b> for <b>residents, businesses, and visitors</b>.</p> <p>T: <b>Digital, and Connected City</b></p> <p>V: The City of Los Angeles envisions a high <b>digital</b> and <b>connected city</b> in 2028.</p> <p>City of Los Angeles (2020 p. 3; p. 5)</p>                                                                                                                                                                                                                                                                | <p>Fields: Economy, Environment, Governance, Living, People</p> <p>Goal: Efficiency, Sustainability, QoL</p> <p>TA: Connection, Technology, Data,</p> <p>Other: Stakeholders, Resources</p> <p>Digital platforms: MyLA311, LA Metro Transit app, Vision Zero LA, Open Data Portal,</p>                                                                                                                                       | <p>Urban Movement Lab</p> <p>UCLA CityLAB</p>                                                                                                    |



AMAZON FEDERAL UNIVERSITY – FACULTY OF TECHNOLOGY



|                                                                                                                                                             |                                                                                                                                                                                                                                                                                                                                                                                                                                                                                                                                                                                                                                                                                                                  |                                                                                                                                                                                                                                                                                                                                                                                                                                                                      |                                                                                                  |
|-------------------------------------------------------------------------------------------------------------------------------------------------------------|------------------------------------------------------------------------------------------------------------------------------------------------------------------------------------------------------------------------------------------------------------------------------------------------------------------------------------------------------------------------------------------------------------------------------------------------------------------------------------------------------------------------------------------------------------------------------------------------------------------------------------------------------------------------------------------------------------------|----------------------------------------------------------------------------------------------------------------------------------------------------------------------------------------------------------------------------------------------------------------------------------------------------------------------------------------------------------------------------------------------------------------------------------------------------------------------|--------------------------------------------------------------------------------------------------|
|                                                                                                                                                             |                                                                                                                                                                                                                                                                                                                                                                                                                                                                                                                                                                                                                                                                                                                  | Cowlines App, LA Open Data - <a href="https://data.lacity.org/">https://data.lacity.org/</a>                                                                                                                                                                                                                                                                                                                                                                         |                                                                                                  |
| <p>23<sup>rd</sup>) San Francisco (USA)</p> <p>Since 2016:</p> <p>San Francisco Smart City Challenge</p> <p>National and Local Project</p>                  | <p>D: a <b>framework</b> for using <b>data, digital technology</b>, civic and policy <b>innovation</b> to enhance the <b>quality of life</b> for <b>all residents</b>, making cities more <b>effective, efficient, equitable and responsive</b> (City and County of San Francisco, n.d., p. 4)</p> <p>T: <b>Connected</b> and <b>Shared</b> City.</p> <p>V: to make more <b>shared choices</b> available so that <b>people</b> of all backgrounds can easily get around without needing to own a car. By promoting shared options, we will ensure that more <b>people</b> can access <b>affordable, safe, clean, and reliable transportation</b> than ever before. (City and Council of San Francisco, 2016)</p> | <p>Fields: Economy, Environment, Living, Mobility, People</p> <p>Goal: Efficiency, Sustainability, QoL</p> <p>TA: Connected, Technology</p> <p>Other: Framework, Data, Digital, Culture of Sharing, EV, Autonomous Vehicles</p> <p>Digital Platforms to Engage Citizens:</p> <p>San Francisco Smart City website</p> <p>SF311 app, SFWifi, SFPark, Cowlines App, Nextdoor app, OpenDataSF</p> <p><a href="https://datasf.org/opendata/">datasf.org/opendata/</a></p> | <p>Create + Build</p> <p>San Francisco Smart City Institute</p> <p>The Urban Prototyping Lab</p> |
| <p>24<sup>th</sup>) HK (China)</p> <p>Since 2018:</p> <p>HK Smart City Blueprint 1.0</p> <p>Since 2021:</p> <p>HK Smart City Blueprint 2.0</p> <p>Local</p> | <p>D: <b>People</b> Centric. It should be built upon the needs of the <b>people</b>, and the benefits should be seen and felt by <b>residents</b> and <b>visitors</b> (HK Innovation and Technology Bureau, 2017 p.2)</p> <p>T: <b>World-class</b> smart city.</p> <p>V: Embrace <b>innovation and technology</b> to build a <b>world-famed</b> Smart HK characterized by strong <b>economy</b> and high <b>quality of life</b>. (HK Innovation and Technology Bureau, 2017 p.3; 2020 p. 3)</p>                                                                                                                                                                                                                  | <p>Fields: Economy, Living, People</p> <p>Goal: Efficiency, QoL</p> <p>TA: Technology</p> <p>Other: Innovation</p> <p>Digital Platforms to Engage Citizens:</p> <p>Smart City Dashboard, iMSmart App, Geospatial Lab, MyObservatory, HKSmart City website.</p> <p>Open Data HK</p> <p><a href="https://data.gov.hk/en/">https://data.gov.hk/en/</a></p>                                                                                                              | <p>CMASS iSPACE</p> <p>HKUST</p> <p>Sustainable Smart Campus, Geospatial Lab</p>                 |



AMAZON FEDERAL UNIVERSITY – FACULTY OF TECHNOLOGY



| Rank and Initiatives                                                                                                             | Smart City Definition (D), Type (T), and Vision(V)                                                                                                                                                                                                                                                                                                                                                                                                                                                                                                                                                                                                                                                                                                                                                                                                                                  | Terms and Digital Platforms                                                                                                                                                                                                                                                                                                                                                                                                                        | Fab, Living or Urban Labs                                                                                                                                                        |
|----------------------------------------------------------------------------------------------------------------------------------|-------------------------------------------------------------------------------------------------------------------------------------------------------------------------------------------------------------------------------------------------------------------------------------------------------------------------------------------------------------------------------------------------------------------------------------------------------------------------------------------------------------------------------------------------------------------------------------------------------------------------------------------------------------------------------------------------------------------------------------------------------------------------------------------------------------------------------------------------------------------------------------|----------------------------------------------------------------------------------------------------------------------------------------------------------------------------------------------------------------------------------------------------------------------------------------------------------------------------------------------------------------------------------------------------------------------------------------------------|----------------------------------------------------------------------------------------------------------------------------------------------------------------------------------|
| <p><b>25<sup>th</sup> Montreal (CA)</b></p> <p>Since 2014: Montreal Smart and Digital City Strategy</p> <p>Local and Private</p> | <p>The Strategy mentioned two definitions according to Ville de Montréal (2015 p. 10) and Open North (2018 p. 40)</p> <p>D1: Effective <b>integration of physical, digital, and human</b> systems in the built <b>environment</b> to deliver a <b>sustainable, prosperous, and inclusive</b> future for its <b>citizens</b> (BSI, 2014).</p> <p>D2: Systems of <b>people</b> interacting with and using flows of energy, materials, services, and financing to catalyze <b>sustainable economic</b> development, <b>resilience</b>, and high <b>quality of life</b>; these flows and interactions become smart through making strategic use of <b>information</b> and <b>communication</b> (European Innovation Partnership on Smart Cities and Communities, 2013).</p> <p><b>T: Smart and Digital City</b></p> <p>V: By 2017, Montreal will be the world’s leading smart city.</p> | <p>Fields: Economy, Environment, Governance, Living, People</p> <p>Goal: Efficiency, Sustainability, and QoL</p> <p>TA: ICT, Information</p> <p>Other: Digital, System, Integration, Communication, resilience.</p> <p>Digital platforms:</p> <p>Montreal Smart City website, Je fais Mtl</p> <p>Civic Tech Montréal, MTL Connect. Montreal BIXI app,</p> <p>Montreal Open Data <a href="http://donnees.montreal.ca/">donnees.montreal.ca/</a></p> | <p>Living Lab de Montréal</p> <p>Cité-ID Liv-ing Lab</p> <p>Concordia University’s Creative engAGE Living Lab (ELL)</p> <p>Rehabilitation Living Lab in the mall (RehabMaLL)</p> |
